# Supplementary material for: Synthesis of uniform PS-b-P2VP nanoparticles via reprecipitation and their use as sacrificial templates for inorganic hollow nanoparticles
Source: Royal Society of Chemistry journal article supplement (doi:10.1039/c2jm30497j), 2012-01-01
Supplement: c2jm30497j.pdf [file c2jm30497j.pdf]

## Electronic supporting information (ESI)

### Synthesis of uniform PS-b-P2VP nanoparticles via reprecipitation and their use as sacrificial templates for inorganic hollow nanoparticles

Choong-Sun Lim, Sang Il Seok\* and Sang Hyuk Im\*

*KRICT-EPFL Global Research Laboratory, Advanced Materials Division, Korea Research Institute of Chemical Technology, 19 Sinseongno, Yuseong, Daejeon, 305-600, Republic of Korea; E-mail: seoksi@kRICT.re.kr, imromy@kRICT.re.kr*

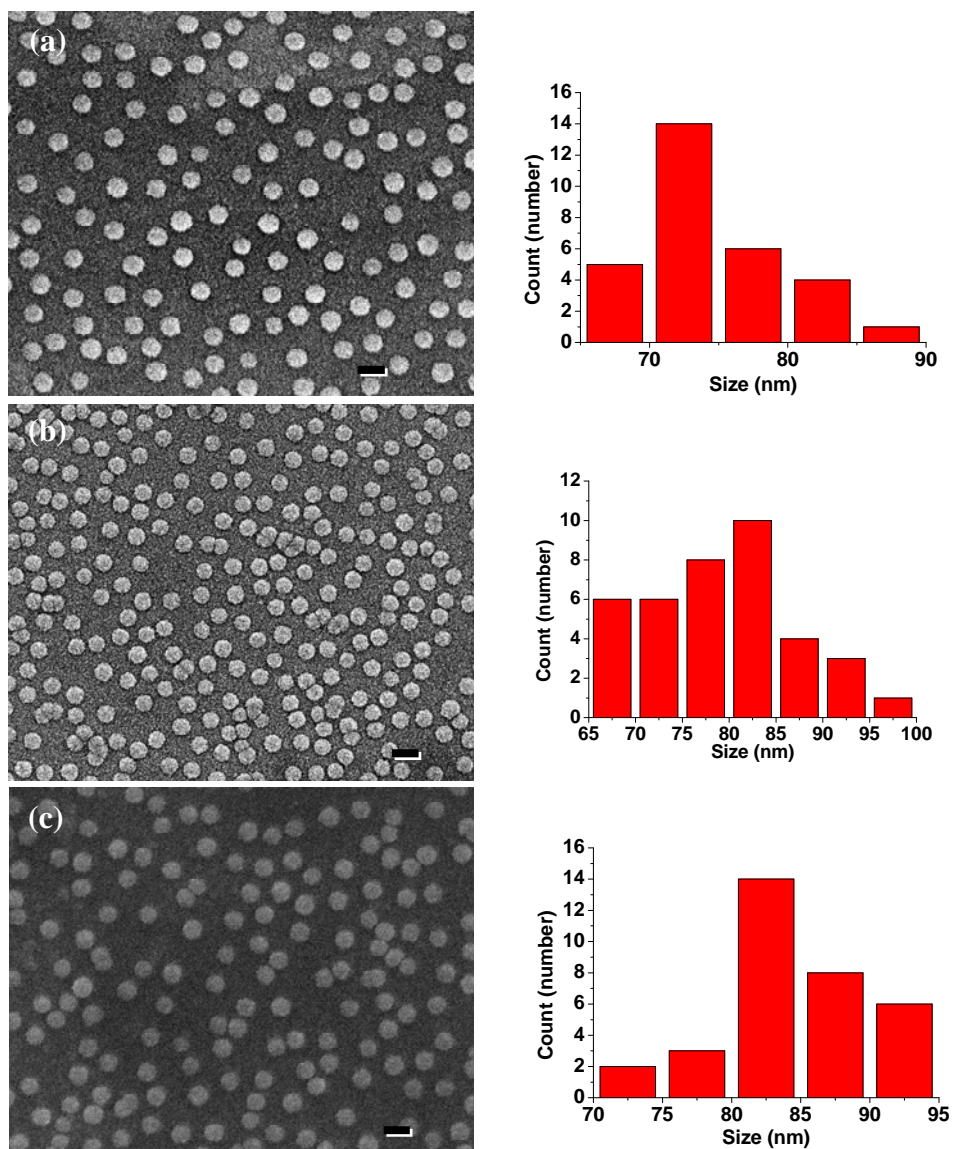

Fig. S1. The larger SEM images and size distribution of PS-b-P2VP BCP nanoparticles prepared by addition of poor solvent (a) methanol, (b) ethanol, and (c) 1-propanol.

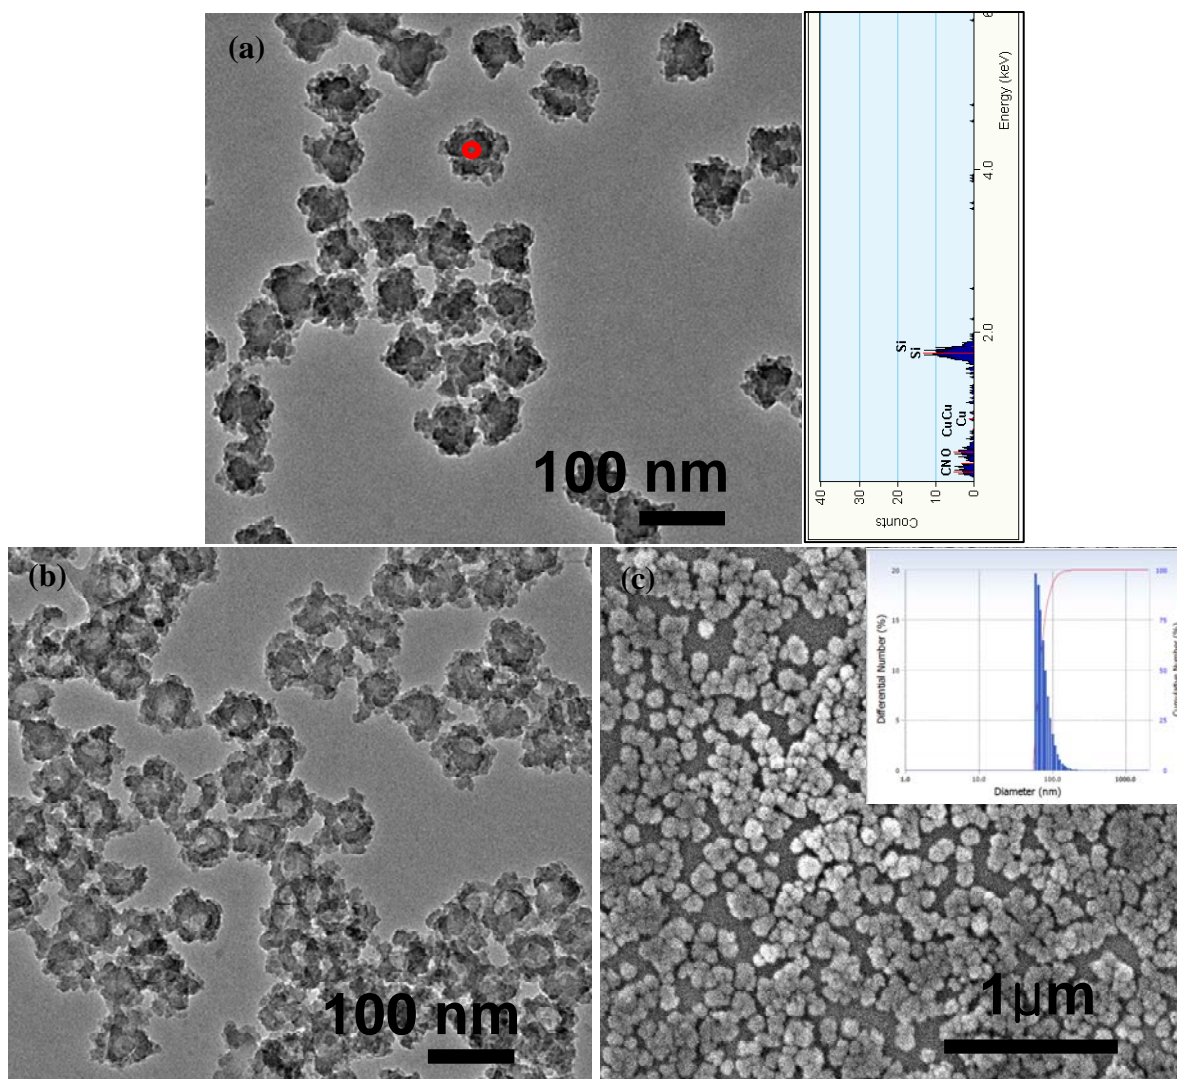

Fig. S2. Larger TEM images of (a) synthesized PS-b-P2VP BCP@silica core-shell particles: right inset = EDX analysis, (b) silica hollow particles obtained by etching of PS-b-P2VP BCP core, and (c) SEM image of hollow silica particles: size distribution of hollow-silica-particles-suspension measured by light scattering.

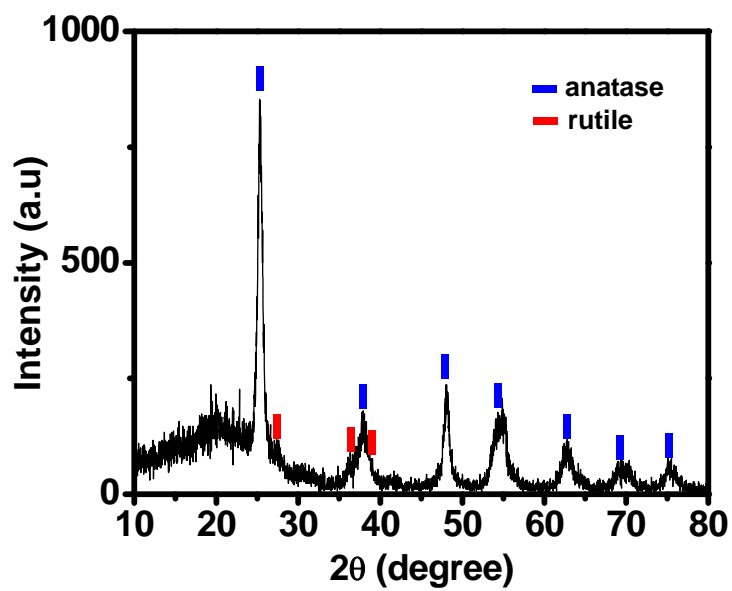

Fig. S3. XRD pattern of calcined hollow titanium oxide nanoparticles.
